# Supplementary material for: MYO5A overexpression promotes invasion and correlates with low lymphocyte infiltration in head and neck squamous carcinoma
Source: Springer Nature journal article supplement (doi:10.1186/s12885-023-11759-5), 2023-12-21

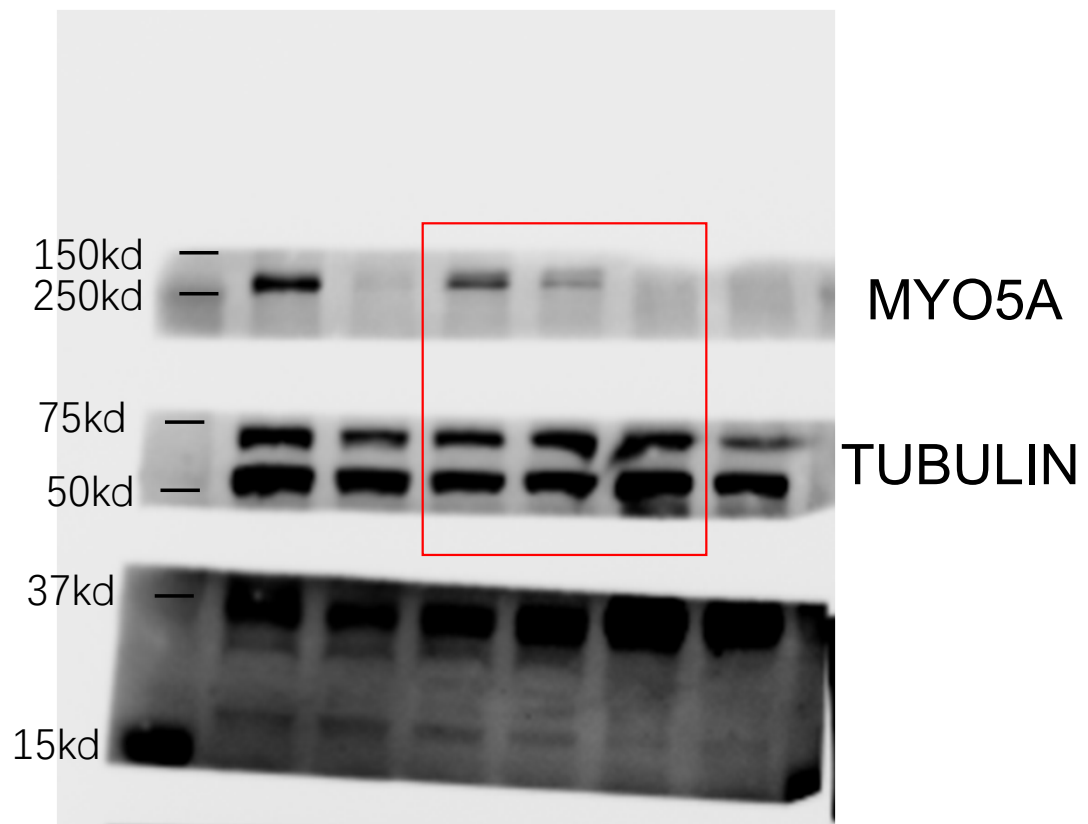

Gels and blots with whole membrane edges

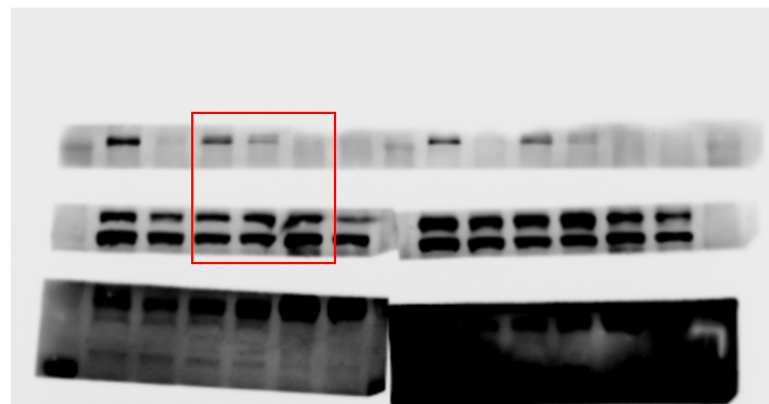

Supplement: MOESM2 [file 26555806]
